# Supplementary material for: Novel 2-mercaptobenzothiazole and 2-mercaptobenzimidazole-derived Ag16 and Ag18 nanoclusters: synthesis and optical properties
Source: Royal Society of Chemistry journal article supplement (doi:10.1039/d4nr01606h), 2024-01-01
Supplement: d4nr01606h1.pdf [file d4nr01606h1.pdf]

*Electronic supplementary information*

**2-mercaptobenzothiazole and 2-mercaptobenzimidazole derived novel Ag<sub>16</sub>  
and Ag<sub>18</sub> nanoclusters: Synthesis and optical properties**

Bedanta Borah<sup>a</sup>, Rohan Sharma<sup>a</sup>, Pankaz K. Sharma<sup>a\*</sup> and Apurba Kr. Barman<sup>a\*</sup>

Department of Chemistry, Cotton University, Panbazar, Guwahati, Assam, INDIA, 781001

## Table of contents

| Title                           | Description                                                                                                                                                                                              | Page No. |
|---------------------------------|----------------------------------------------------------------------------------------------------------------------------------------------------------------------------------------------------------|----------|
|                                 | Experimental section                                                                                                                                                                                     | 3        |
| <b>Figure S1</b>                | FTIR spectra of (a) Ag-MBTNC and (b) Ag-MBINC.                                                                                                                                                           | 4        |
| <b>Figure S2</b>                | UV-visible spectra of (a) Ag-MBTNC and (b) Ag-MBINC in different time intervals.                                                                                                                         | 4        |
| <b>Figure S3</b>                | Photoluminescence spectrum of (a) Ag-MBTNC and (b) Ag-MBINC in different time intervals.                                                                                                                 | 5        |
| <b>Figure S4</b>                | Photographs of solutions of Ag-MBTNC under UV light in different time intervals.                                                                                                                         | 5        |
| <b>Figure S5</b>                | Quantum yield measurements of Ag-MBTNC                                                                                                                                                                   | 5-6      |
| <b>Figure S6</b>                | Lifetime measurements of Ag-MBTNC                                                                                                                                                                        | 7        |
| <b>Figure S7</b>                | Atomic percentages of Ag-MBTNC and Ag-MBINC from XPS data.                                                                                                                                               | 7        |
| <b>Table T1</b>                 | Relative atomic percentages of C, S, N, O and Ag with respect to S in Ag-MBTNC.                                                                                                                          | 8        |
| <b>Table T2</b>                 | Relative atomic percentages of C, S, N, O and Ag with respect to S in Ag-MBINC.                                                                                                                          | 8        |
| <b>FigureS8</b>                 | PXRD of (a) Ag-MBTNC and (b) Ag-MBINC.                                                                                                                                                                   | 9        |
| <b>Table T3</b>                 | TGA data of Ag-MBTNC.                                                                                                                                                                                    | 9        |
| <b>Table T4</b>                 | TGA data of Ag-MBINC.                                                                                                                                                                                    | 9        |
|                                 | Computational Details.                                                                                                                                                                                   | 10       |
| <b>Tables T5 &amp; T6</b>       | Selected structural parameters of tautomers <b>2-MBI (1a and 1b )</b> and 2-MBI- Ag(I) complex [ <b>1a(-) _Ag<sup>+</sup></b> ] in gas phase.                                                            | 10-11    |
| <b>Tables T7, T8 &amp; T9</b>   | Selected structural parameters of tautomers of 2-MBT ( <b>2a</b> and <b>2b</b> ) and 2-MBT-Ag(I) complexes <b>2a_1 (-) _Ag<sup>+</sup></b> and <b>2a_2 (-) _Ag<sup>+</sup></b> in gas phase.             | 11-12    |
| <b>Table T10, T11 &amp; T12</b> | Selected structural parameters of 2-MBI- Ag(I) complex <b>1a(-) _Ag<sup>+</sup></b> and 2-MBT-Ag(I) complexes <b>2a_1 (-) _Ag<sup>+</sup></b> and <b>2a_2 (-) _Ag<sup>+</sup></b> in methanol.           | 13-14    |
| <b>Tables T13 &amp; T14</b>     | NICS values (ppm) for 2-MBI and 2-MBI-Ag(I) complex [ <b>1a</b> and <b>1a(-) _Ag<sup>+</sup></b> ] and NICS values (ppm) for 2-MBT and 2-MBT-Ag(I) complex [ <b>2a, 2a_1(-) _Ag<sup>+</sup></b> ]        | 15-16    |
| <b>Tables T15 &amp; T16</b>     | The HOMO, the LUMO and their energies (a.u.) of compounds <b>1a, 1a(-) and 1a(-) _Ag<sup>+</sup></b> . The HOMO and the LUMO energies (a.u.) of compounds <b>2a, 2a(-) and 2a_1(-) _Ag<sup>+</sup></b> . | 16       |
| <b>Figure S9 &amp; S10</b>      | The HOMO, LUMO orbitals and their energy gap of <b>1a, 1a(-) and 1a(-) _Ag<sup>+</sup>; 2a, 2a(-) and 2a_1(-) _Ag<sup>+</sup></b> .                                                                      | 17       |
| <b>Tables T17 &amp; T18</b>     | Selected bond parameters for interaction of 2-MBT and 2-MBI with both Ag (I) and Ag (0).                                                                                                                 | 18       |
|                                 | The co-ordinates of the optimized structures                                                                                                                                                             | 19-27    |

## Experimental section:

**Instrumentation:** The FTIR spectra of Ag-MBTNC and Ag-MBINC was recorded in a Bruker APEX II spectrophotometer in the frequency range 500-4000  $\text{cm}^{-1}$  (KBR phase). UV-visible absorption spectrum of Ag-MBTNC and Ag-MBINC were measured up through Shimadzu UV-2600 spectrophotometer (model no. UV-18000). In these measurements the two nanoclusters are dissolved in ethanol under sonication and in these measurements the spectrum are recorded from 200 nm to 1400 nm range in quartz cuvette having 1cm optical path length. The photoluminescence spectrum of two nanoclusters were recorded in Horiba FluoroMax-4 instrument by exciting the nanoclusters from 264 to 270 nm range. Photoluminescence decay lifetime measurements were carried out on a time-correlated single photon counting (Edinburgh Instruments-Lifespec II) using a pulsed laser at 375 nm with an fwhm of  $\sim 153$  ns. The MALDI-TOF mass spectrometry were conducted by using Bruker, Model: Autoflex speed mass spectrometer in appositve mode by using sinapic acid as a matrix at (at 1:100 ratio of sample to matrix). For MALDI MS studies a pulsed nitrogen laser of 337 nm was used. The X-ray photoelectron spectroscopy (XPS) was used to evaluate the chemical composition of nanoclusters by using a Thermo-Scientific ESCALAB Xi<sup>+</sup> (UK) with a monochromatic Al K $\alpha$  X-ray source (1486.6 eV). RigakuUltimaIV X-ray powder diffractometer was used for PXRD measurements of all the nanoclusters with a Cu K $\alpha$  X-ray source, equipped with a Ni filter to suppress K $\beta$  emission and a D/teXUltra high-speed position sensitive detector, and measurements were performed at room temperature, with a scan rate of  $10^\circ \text{min}^{-1}$ , scan range  $2\theta = 5-50^\circ$ , and step size of  $0.02^\circ$ . Thermogravimetric (TG) measurements of two nanoclusters were performed on a Mettler Toledo instrument with a temperature range of 25-700  $^\circ\text{C}$  and a heating rate of  $20^\circ \text{C min}^{-1}$ . Nanoclusters were placed in silica crucibles and purged by a steam of nitrogen flowing at 80 mL

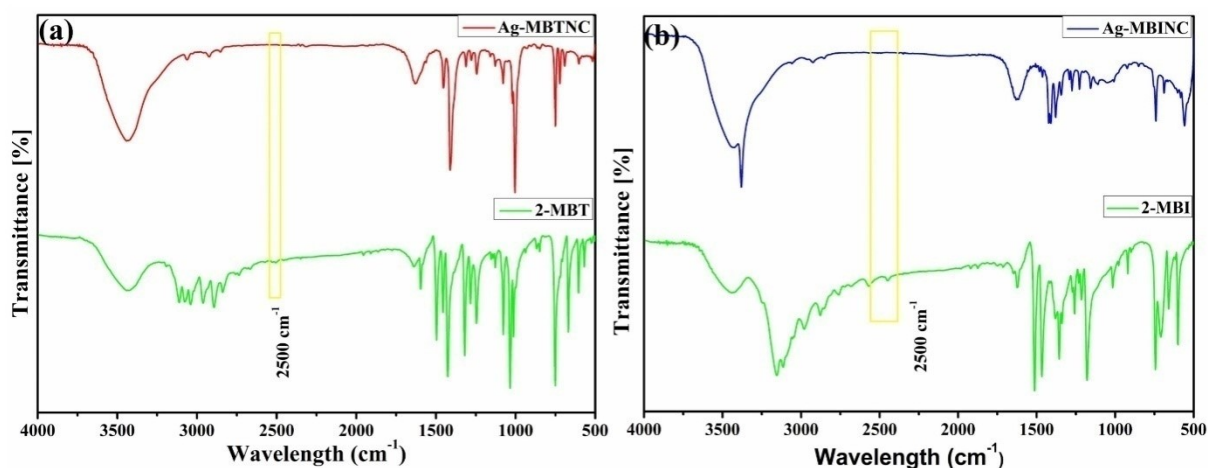

**Figure S1.** FTIR spectra of (a) 2-MBT (green) and Ag-MBTNC (red), (b) 2-MBI (green) and Ag-MBINC (blue).

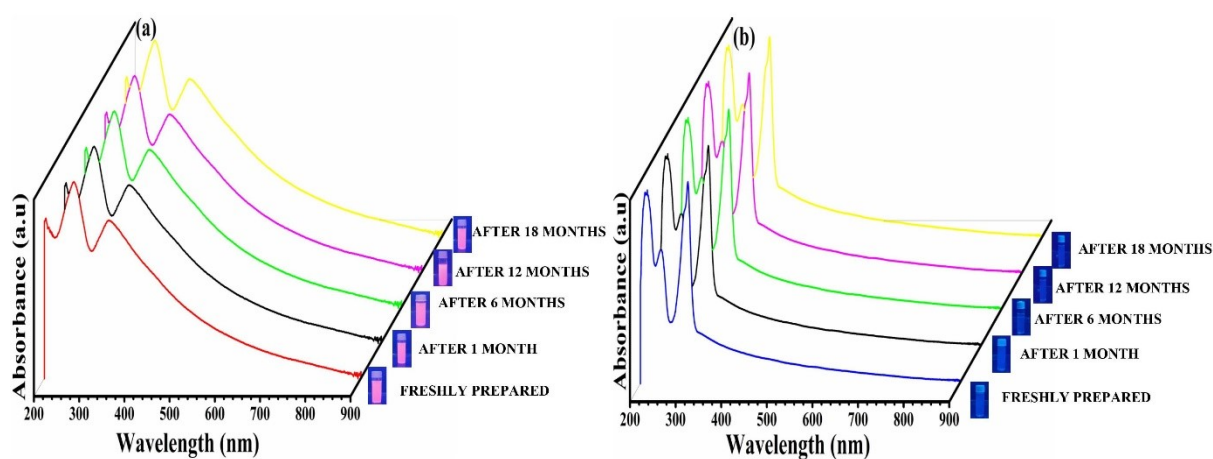

**Figure S2.** UV-visible spectra of (a) Ag-MBTNC in ethanol: freshly prepared, after one month, after 6 months, after 12 months and after 18 months (b) Ag-MBINC in ethanol: freshly prepared, after one month, after 6 months, after 12 months and after 18 months.

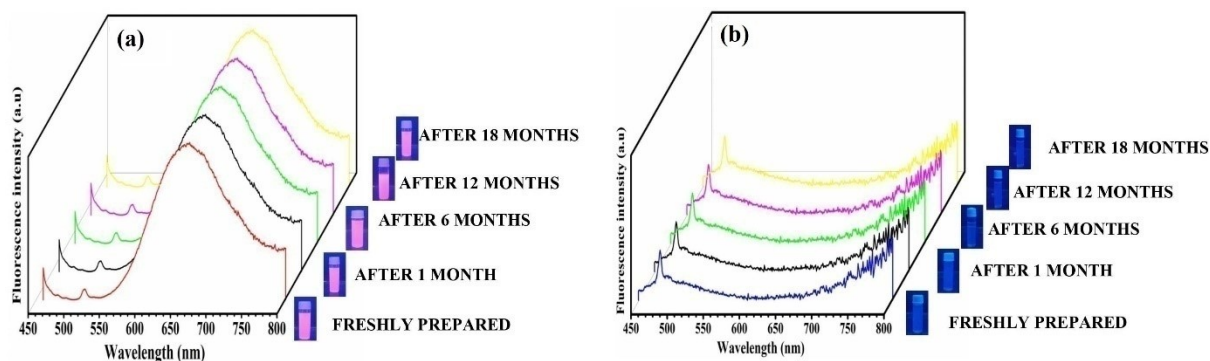

**Figure S3.** Photoluminescence spectrum of (a) Ag-MBTNC (in aqueous ethanol): freshly prepared, and freshly prepared solution of one month, 6 months, 12 months and 18 months old nanoclusters (b) Ag-MBINC (in aqueous ethanol): freshly prepared, and freshly prepared solution of one month, 6 months, 12 months and 18 months old nanoclusters.

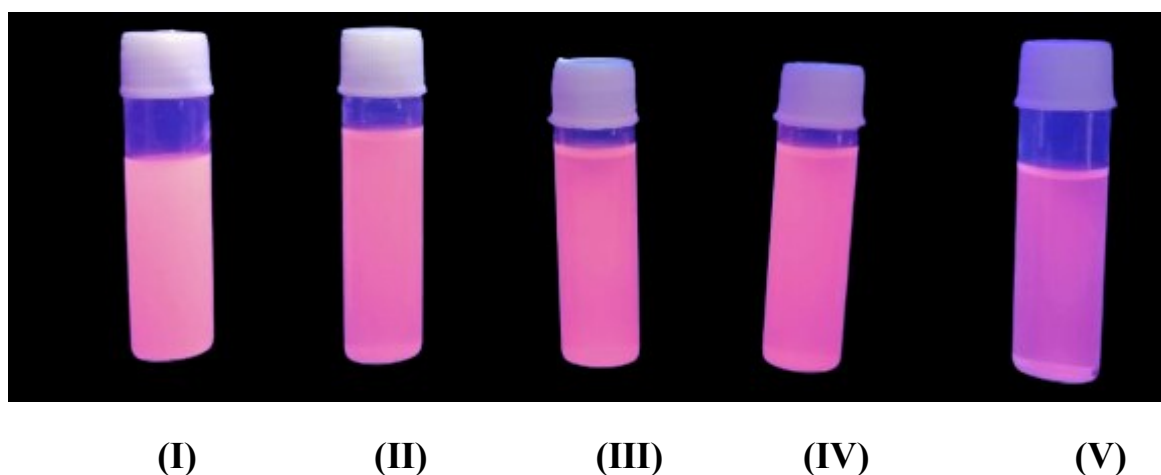

**Figure S4.** Photographs of ethanolic solution of Ag-MBTNC under UV light: freshly prepared (I) and freshly prepared solution of one month (II), 6 months (III), 12 months (IV) and 18 months (V) old nanoclusters.

#### Quantum yield (QY) calculation:

The QY of Ag-MBTNC (sample) was determined from the slope of plot (Absorbance vs. maximum emission intensity). Here, quinine sulphate (in 0.1 M H<sub>2</sub>SO<sub>4</sub>) was taken as standard with a known QY of 54%. Ag-MBTNC was dissolved in ethanol. The following equation is used for QY measurement.

$$QY_{sample} = QY_{std} \times \left( \frac{K_{sample}}{K_{std}} \right) \times \left( \frac{\eta_{sample}}{\eta_{std}} \right)^2$$

where  $K$  is the slope determined from the graph, and  $\eta$  is the refractive index of the solvent (refractive index of ethanol is 1.36). The same excitation wavelength (350 nm) and band width were applied to the sample and the standard.

| Slope (sample)     | Slope (standard)   | $(\eta_{sample}/\eta_{std})^2$ | QY <sub>std</sub> | QY <sub>sample</sub> |
|--------------------|--------------------|--------------------------------|-------------------|----------------------|
| $1.15 \times 10^6$ | $6.90 \times 10^6$ | 1.85                           | 54%               | 16.65%               |

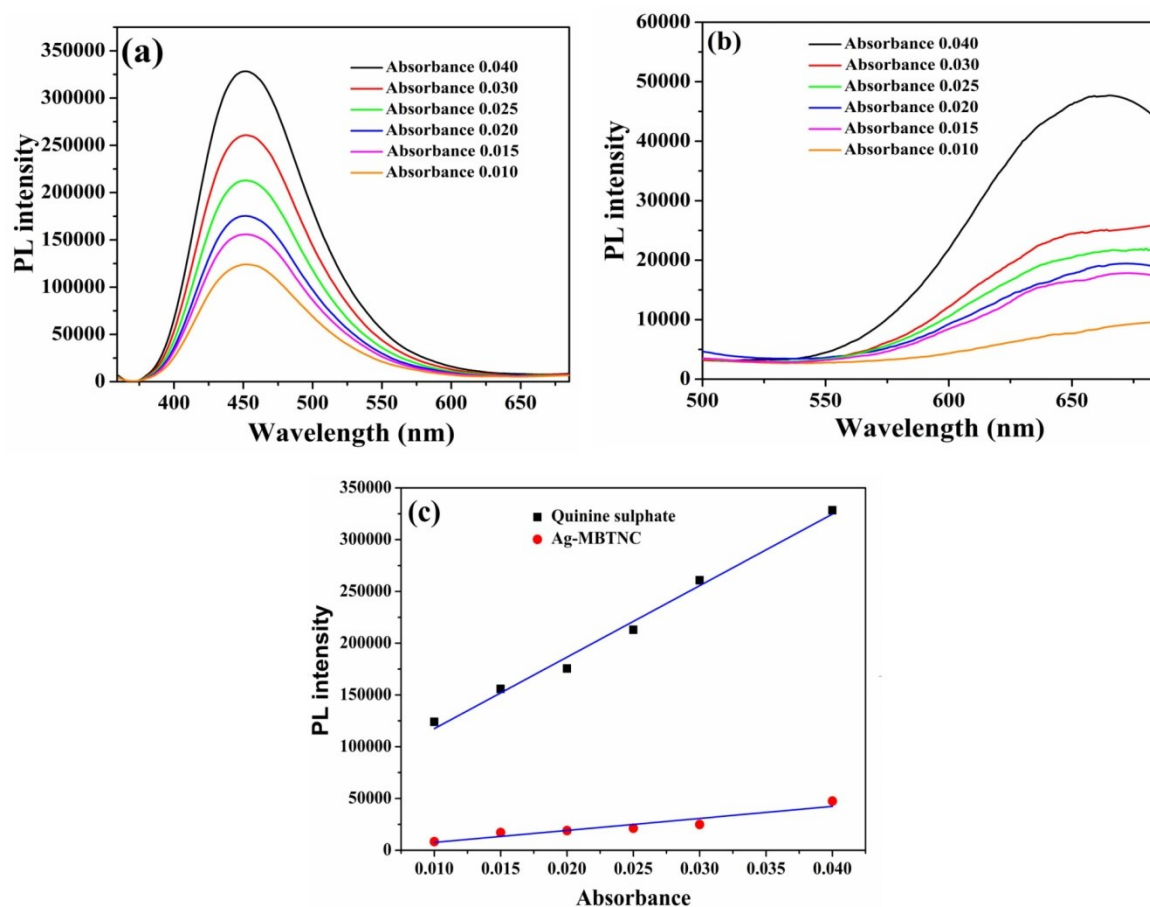

**Figure S5:** Comparative photoluminescence spectra for (a) quinine sulphate (b) Ag-MBTNC at the same excitation wavelength and with the same absorbance at excitation wavelength. (c) Plot of maximum emission intensity vs absorbance used for QY calculations.

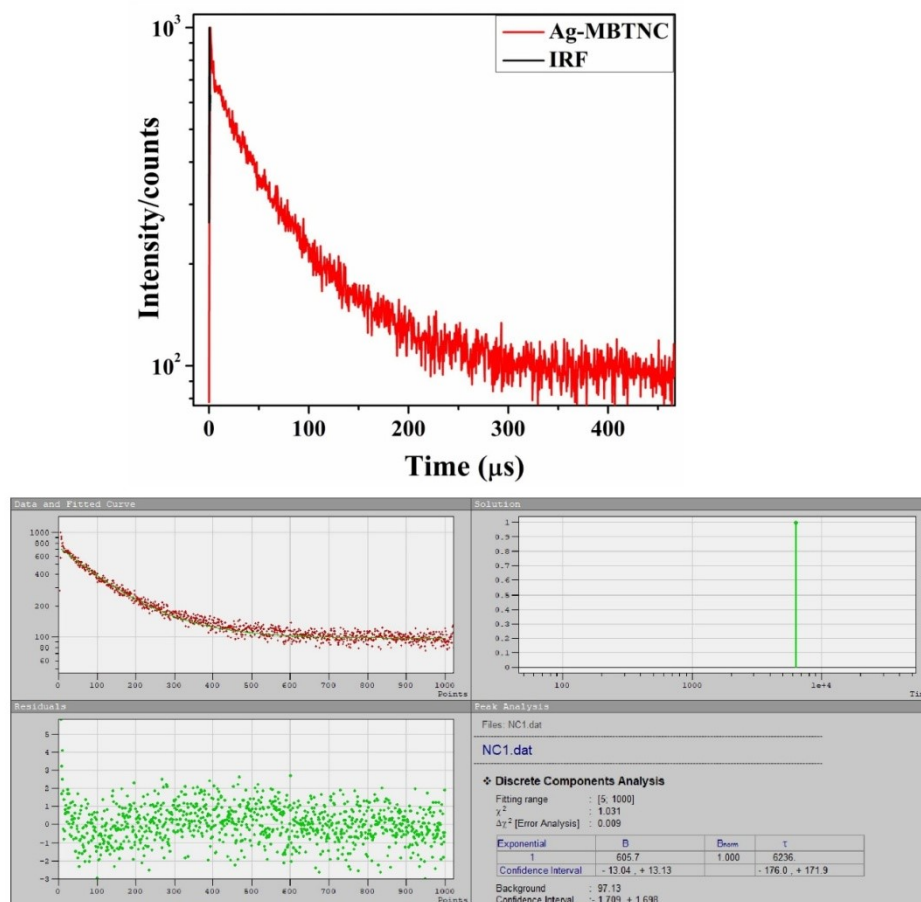

Figure S6: Fluorescence life time decay of Ag-MBTNC.

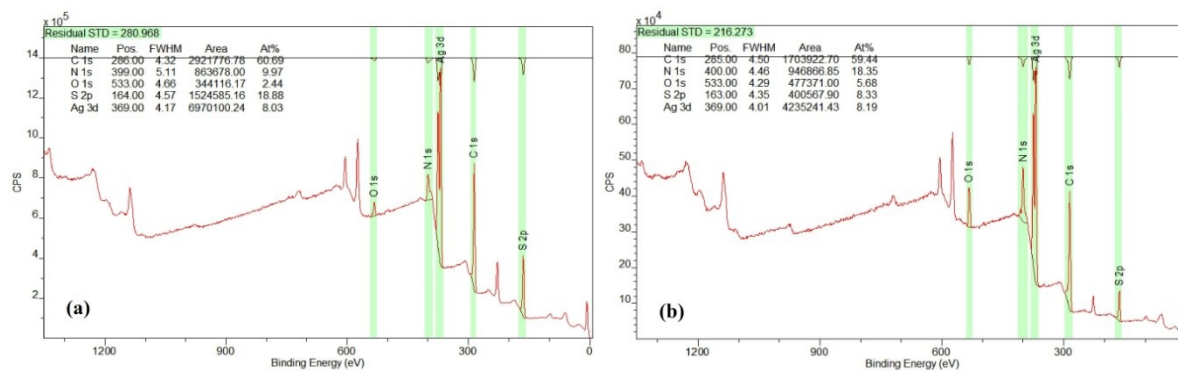

Figure S7. Atomic percentages from XPS spectra of (a) Ag-MBTNC and (b) Ag-MBINC.

**Table T1.** Relative atomic percentages of C, S, N, O and Ag with respect to S in Ag-MBTNC.

| NAME OF THE ELEMENTS | ATOMIC PERCENTAGE (%)<br>from XPS data | RATIO        |                 |
|----------------------|----------------------------------------|--------------|-----------------|
|                      |                                        | EXPERIMENTAL | THEORITICAL     |
| CARBON (C)           | ~60.69                                 | C/S=3.21     | 89 C/24 S=3.70  |
| SULPHUR (S)          | ~18.88                                 | S/S=1        | 24 S/24 S=1     |
| NITROGEN (N)         | ~9.97                                  | N/S=0.52     | 12 N/24 S=0.55  |
| OXYGEN (O)           | ~2.44                                  | O/S=0.12     | 4 O/24 S=0.16   |
| SILVER (Ag)          | ~8.03                                  | Ag/S=0.42    | 16 Ag/24 S=0.66 |

**Table T2.** Relative atomic percentages of C, S, N, O and Ag with respect to S in Ag-MBINC.

| NAME OF ELEMENTS | ATOMIC PERCENTAGE (%) | RATIO        |                 |
|------------------|-----------------------|--------------|-----------------|
|                  |                       | EXPERIMENTAL | THEORITICAL     |
| CARBON (C)       | ~59.44                | C/S=7.13     | 88 C/12 S=7.33  |
| SULPHUR (S)      | ~8.33                 | S/S=1        | 12 S/12 S=1     |
| NITROGEN (N)     | ~18.35                | N/S=2.20     | 24 N/12 S=2     |
| OXYGEN (O)       | ~5.68                 | O/S=0.68     | 4 O/12 S=0.33   |
| SILVER (Ag)      | ~8.19                 | Ag/S=0.98    | 18 Ag/12 S=1.50 |



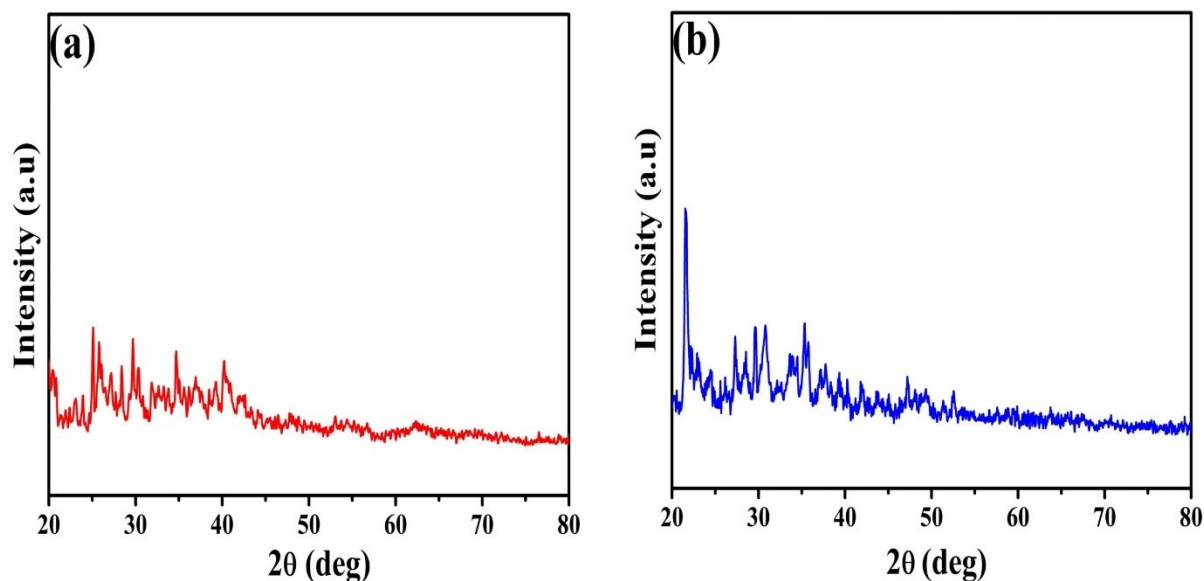

**Figure S8.** PXRD patterns of (a) Ag-MBTNC and (b) Ag-MBINC

**Table T3.** TGA data of Ag-MBTNC

| Name                                                                                                           | Molecular weight | Experimental | Theoretical |
|----------------------------------------------------------------------------------------------------------------|------------------|--------------|-------------|
| Ag-MBTNC<br>(C <sub>89</sub> H <sub>66</sub> Ag <sub>16</sub> N <sub>12</sub> O <sub>4</sub> S <sub>24</sub> ) | 3863.0           |              |             |
| Solvent (C <sub>5</sub> H <sub>18</sub> O <sub>4</sub> )                                                       | 142.2            | 3.6%         | 3.7%        |
| Ligand (C <sub>84</sub> H <sub>48</sub> N <sub>12</sub> S <sub>24</sub> )                                      | 1994.9           | 52.2%        | 51.6%       |
| Silver residue (Ag <sub>16</sub> )                                                                             | 1725.8           | 44.2%        | 44.7%       |

**Table T4.** TGA data of Ag-MBINC

| Name                                                                                                           | Molecular weight | Experimental | Theoretical |
|----------------------------------------------------------------------------------------------------------------|------------------|--------------|-------------|
| Ag-MBINC<br>(C <sub>88</sub> H <sub>76</sub> Ag <sub>18</sub> N <sub>24</sub> O <sub>4</sub> S <sub>12</sub> ) | 3860.1           |              |             |
| Solvent (C <sub>4</sub> H <sub>16</sub> O <sub>4</sub> )                                                       | 128.1            | 4.0%         | 3.3%        |
| Ligand (C <sub>84</sub> H <sub>60</sub> N <sub>24</sub> S <sub>12</sub> )                                      | 1790.3           | 46.6%        | 46.4%       |
| Silver residue (Ag <sub>18</sub> )                                                                             | 1941.6           | 49.4%        | 50.3%       |

## Computational Details

All the structures were optimized using the PBE0<sup>1</sup> functional and the Def2-TZVP basis sets with ORCA 5.0.3. Grimme's third-order dispersion correction was incorporated with Becke-Johnson damping to properly take into account the effect of dispersion in our studied systems. The Effect of the solvent, methanol, was gauged with the implicit polarizable continuum model CPCM with ORCA 5.0.3. The NBO calculations were carried out using the above mentioned model chemistry to obtain the HOMO and the LUMO energy values and their energy gap. Moreover, NICS calculations were performed at the PBE0/Def2-TZVP level of theory, to investigate the aromatic nature of the molecules before and after incorporating the Ag<sup>+</sup> metal ion. Both the NBO and NICS calculation were performed in Gaussian16.

## Computational results:

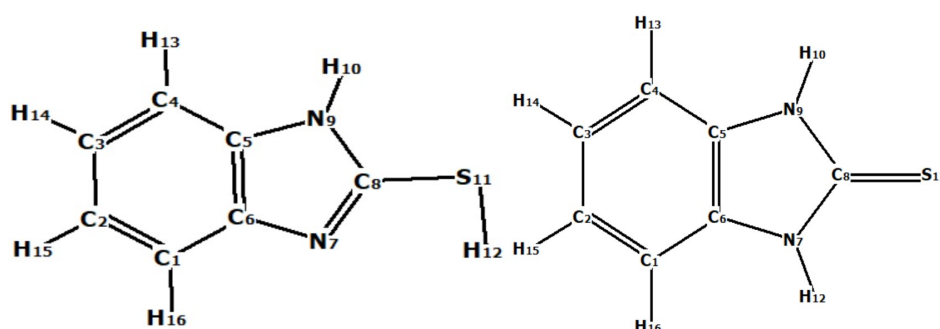

2-MBI thione form (1a)

2-MBI thiol form (1b)

**Table T5:** Selected structural parameters of tautomers 2-MBI. The distances are given in Å.

| Parameter | 2-MBI thione form (1a) | 2-MBI thiol form (1b) |
|-----------|------------------------|-----------------------|
| C1-C2     | 1.39                   | 1.38                  |
| C1-C6     | 1.38                   | 1.39                  |
| C2-C3     | 1.39                   | 1.40                  |
| C5-C6     | 1.40                   | 1.41                  |
| C6-N7     | 1.38                   | 1.38                  |
| N7-C8     | 1.37                   | 1.30                  |
| N7-H12    | 1.00                   | ----                  |
| C8-C9     | 1.37                   | 1.37                  |
| C8-S11    | 1.65                   | 1.74                  |
| N9-H10    | 1.00                   | 1.00                  |
| S11-H12   | ----                   | 1.34                  |

The energy difference between **1a** and **1b** is 12.90 Kcal mol<sup>-1</sup> i.e., **1a** is 12.90 Kcal mol<sup>-1</sup> more stable than that of **1b**.

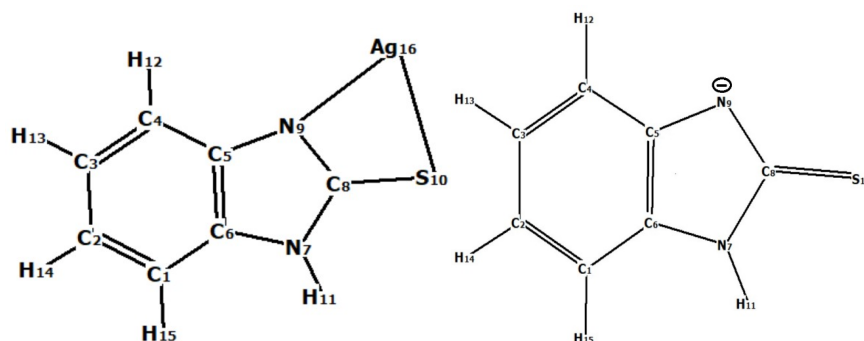

**1a (-) \_Ag<sup>+</sup>**

**1a (-)**

This is the structure obtained upon addition of Ag<sup>+</sup> to the 1a (-).

**Table T6:** Selected structural parameters of **1a (-) -Ag(I)**. The distances are given in Å.

|                               | N9-Ag16 | S10-Ag16 | N9-C8 | C8-S10 |
|-------------------------------|---------|----------|-------|--------|
| <b>1a (-) _Ag<sup>+</sup></b> | 2.36    | 2.48     | 1.33  | 1.72   |

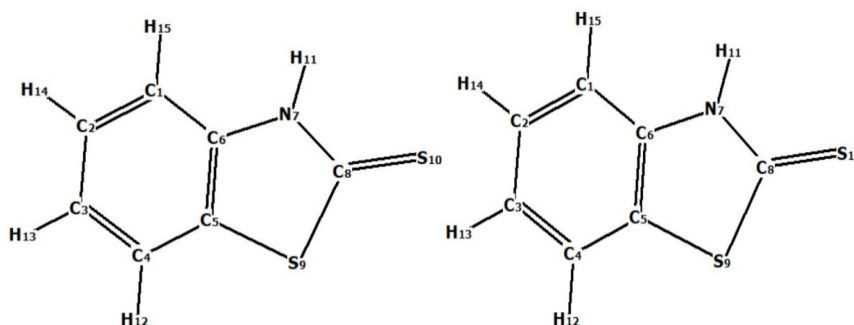

**2-MBT thione form (2a)**

**2-MBT thiol form (2b)**

**Table T7:** Selected structural parameters of **2a** and **2b**. The distances are given in Å.

| Parameter | <b>2a</b> | <b>2b</b> |
|-----------|-----------|-----------|
| C1-C2     | 1.38      | 1.38      |
| C1-C6     | 1.39      | 1.39      |
| C2-C3     | 1.39      | 1.40      |
| C5-C6     | 1.40      | 1.41      |
| C5-S9     | 1.74      | 1.73      |
| C6-N7     | 1.38      | 1.38      |
| N7-C8     | 1.36      | 1.29      |
| N7-H11    | 1.01      | ----      |
| C8-S9     | 1.75      | 1.75      |
| C6-S10    | 1.64      | 1.74      |

The energy difference between **2a** and **2b** is 8.16 Kcal mol<sup>-1</sup> i.e., **2a** is 8.16 Kcal mol<sup>-1</sup> more stable than that of **2b**.

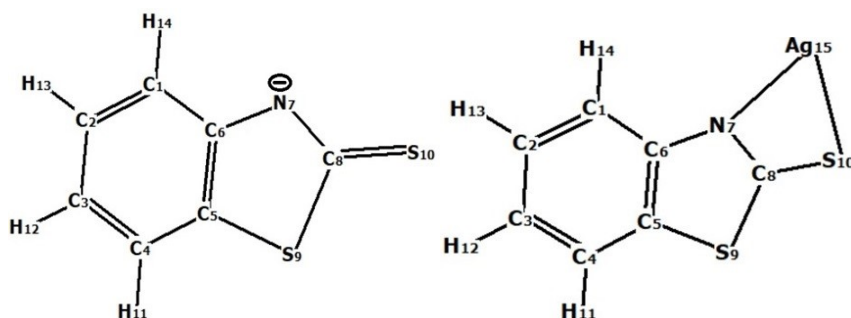

**2a(-)**

**2a<sub>1</sub>(-)<sub>Ag</sub><sup>+</sup>**

This structure is obtained upon addition of Ag<sup>+</sup> to the **2a**<sub>1</sub>(-).

**Table T8:** Selected structural parameters of **2a**<sub>1</sub>(-)<sub>Ag</sub><sup>+</sup>. The distances are given in Å.

|                                                   | N7-Ag15 | S10-Ag15 | N7-C8 | C8-S10 |
|---------------------------------------------------|---------|----------|-------|--------|
| <b>2a<sub>1</sub>(-)<sub>Ag</sub><sup>+</sup></b> | 2.42    | 2.45     | 1.31  | 1.71   |

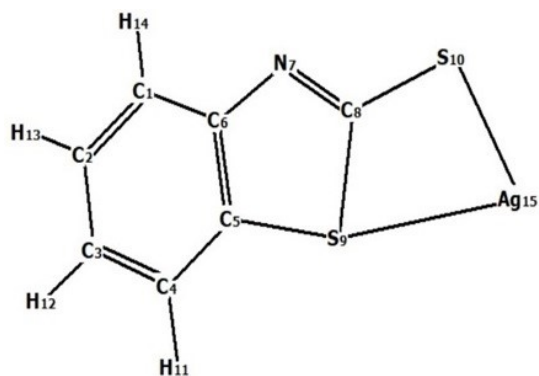

**2a<sub>2</sub>(-)<sub>Ag</sub><sup>+</sup>**

This structure is obtained upon addition of Ag<sup>+</sup> to the **2a**<sub>2</sub>(-).

**Table T9:** Selected structural parameters of **2a**<sub>2</sub>(-)<sub>Ag</sub><sup>+</sup>. The distances are given in Å.

|                                                   | S9-Ag15 | S10-Ag15 | N7-C8 | C8-S10 |
|---------------------------------------------------|---------|----------|-------|--------|
| <b>2a<sub>2</sub>(-)<sub>Ag</sub><sup>+</sup></b> | 3.21    | 2.34     | 1.29  | 1.73   |

From the above data, it is evident that the **2a\_1 (-) \_Ag<sup>+</sup>** is 6.93 kcal mol<sup>-1</sup> more stable than **2a\_2 (-) \_Ag<sup>+</sup>**. This indicates that the addition of Ag<sup>+</sup> to the **2a(-)** molecule favors the addition from N and S as coordinating atoms rather than S and S.

### In Methanol ( $\epsilon= 32.63$ )

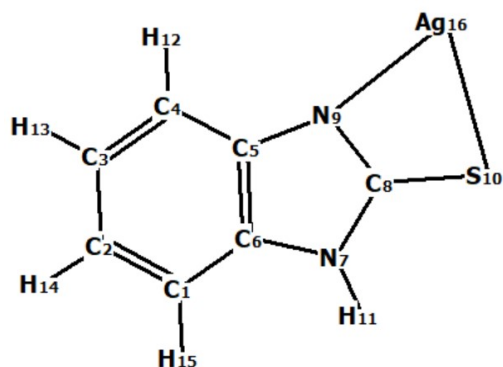

### 1a (-) \_Ag<sup>+</sup>( in methanol)

**Table T10:** Selected structural parameters of **1a(-) \_Ag<sup>+</sup>** in methanol. The distances are given in Å.

| =                             | N9-Ag16 | S10-Ag16 | N9-C8 | C8-S10 |
|-------------------------------|---------|----------|-------|--------|
| <b>1a (-) _Ag<sup>+</sup></b> | 2.49    | 2.47     | 1.33  | 1.72   |

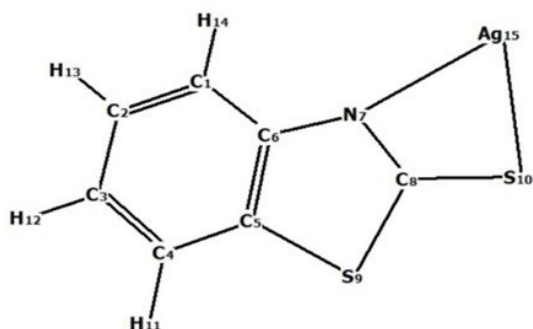

### 2a\_1 (-) \_Ag<sup>+</sup>(in methanol)

**Table T11:** Selected structural parameters of **2a\_1(-) \_Ag<sup>+</sup>** in methanol. The distances are given in Å.

|                                 | N7-Ag15 | S10-Ag15 | N7-C8 | C8-S10 |
|---------------------------------|---------|----------|-------|--------|
| <b>2a_1 (-) _Ag<sup>+</sup></b> | 2.72    | 2.42     | 1.30  | 1.72   |

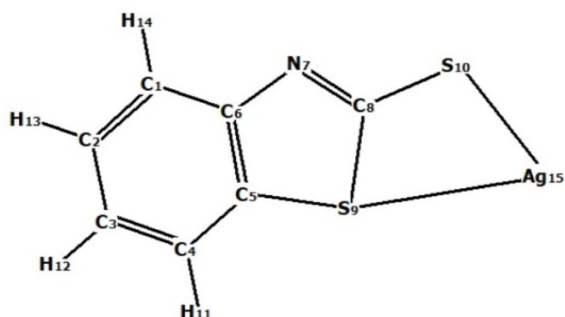

### 2a\_2 (-) \_Ag<sup>+</sup>(Methanol)

**Table T12:** Selected structural parameters of **2a\_2(-)\_Ag<sup>+</sup>** in methanol. The distances are given in Å.

|                                 | S9-Ag15 | S10-Ag15 | N7-C8 | C8-S10 |
|---------------------------------|---------|----------|-------|--------|
| <b>2a_2 (-) _Ag<sup>+</sup></b> | 3.31    | 2.36     | 1.30  | 1.73   |

From the above data, it is evident that **2a\_1 (-)\_Ag<sup>+</sup>** is 1.56 kcal mol<sup>-1</sup> more stable than **2a\_2 (-)\_Ag<sup>+</sup>** in methanol.

**NICS computation:** The NICS method is used to evaluate the aromatic nature of the molecules. The NICS (0), NICS (0.5), NICS (1) and NICS (1)<sub>zz</sub> are calculated though the NICS (1) and NICS (1)<sub>zz</sub> are more reliable for the study of aromaticity. For the purpose of comparison, the NICS values of benzene are also calculated. The more negative the NICS value, the more pronounced is the aromatic character of the molecule.

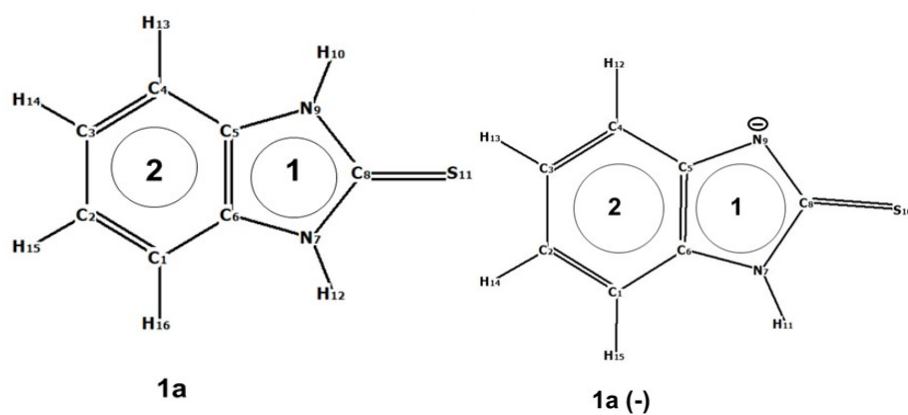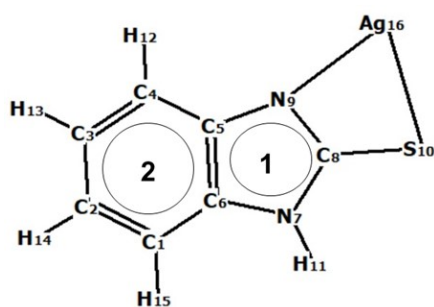**1a(-)\_Ag<sup>+</sup>****Table T13: NICS Values (ppm) for compound 1a, 1a(-) and 1a(-)\_Ag<sup>+</sup>**

| Molecules                   | On ring 1 |            |          |                        | On ring 2 |            |          |                        |
|-----------------------------|-----------|------------|----------|------------------------|-----------|------------|----------|------------------------|
|                             | NICS (0)  | NICS (0.5) | NICS (1) | NICS (1) <sub>zz</sub> | NICS (0)  | NICS (0.5) | NICS (1) | NICS (1) <sub>zz</sub> |
| <b>1a</b>                   | -7.3      | -7.4       | 5.4      | -14.0                  | -9.7      | -10.8      | 10.0     | -27.9                  |
| <b>1a(-)_Ag<sup>+</sup></b> | -8.8      | -9.6       | -7.6     | -20.0                  | -10.1     | -11.2      | -10.4    | -29.1                  |

The NICS values of benzene using the same model chemistry are

NICS (0) = -8.2 ppm

NICS (0.5) = -10.0 ppm

NICS (1) = -10.1 ppm

NICS (1)<sub>zz</sub> = -30.2 ppm

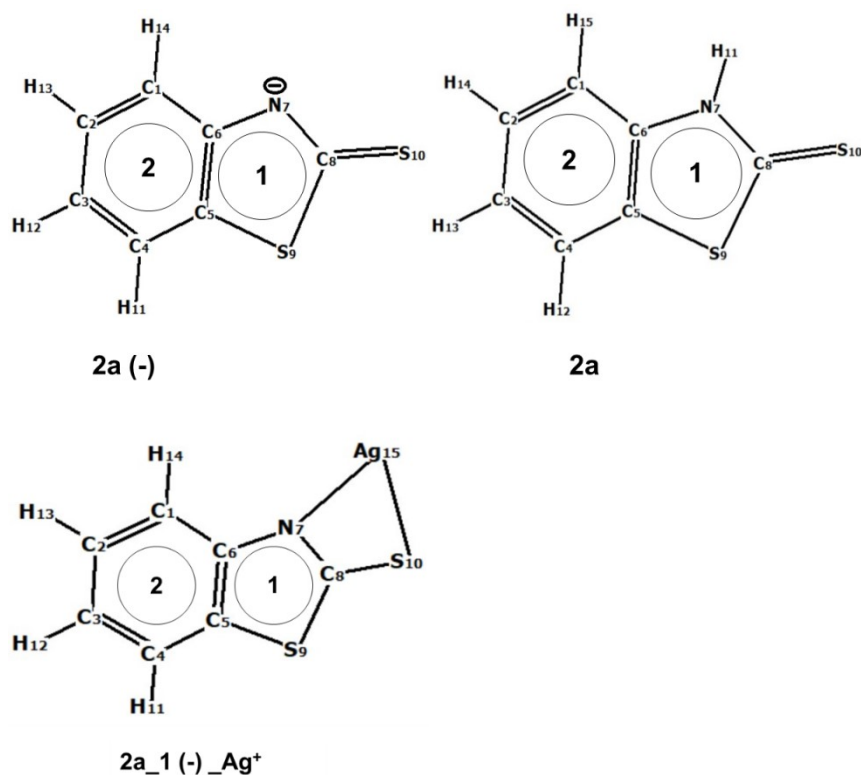

**Table T14: NICS Values (ppm) for compounds 2a, 2a(-), 2a\_1(-)\_Ag<sup>+</sup> and 2a\_2(-)\_Ag<sup>+</sup>**

| Molecules               | On ring 1 |            |          |                        | On ring 2 |            |          |                        |
|-------------------------|-----------|------------|----------|------------------------|-----------|------------|----------|------------------------|
|                         | NICS (0)  | NICS (0.5) | NICS (1) | NICS (1) <sub>zz</sub> | NICS (0)  | NICS (0.5) | NICS (1) | NICS (1) <sub>zz</sub> |
| 2a                      | -5.8      | -5.6       | -4.0     | -8.6                   | -8.7      | -10.0      | -9.5     | -27.0                  |
| 2a_1(-)_Ag <sup>+</sup> | -7.0      | -7.7       | -6.5     | -14.6                  | -9.2      | -10.6      | -10.0    | -28.1                  |

**Table T15: The HOMO and the LUMO energies (a.u.) and the HOMO-LUMO energy gap (eV) of compounds 1a, 1a(-) and 1a(-)\_Ag<sup>+</sup>**

| Molecule              | E <sub>HOMO</sub> (au) | E <sub>LUMO</sub> (au) | ΔE <sub>H-L</sub>  (eV) |
|-----------------------|------------------------|------------------------|-------------------------|
| 1a                    | -0.21642               | -0.03437               | 4.95                    |
| 1a(-)                 | -0.03782               | 0.12552                | 4.44                    |
| 1a(-)_Ag <sup>+</sup> | -0.20762               | -0.08870               | 3.24                    |

**Table T16: The HOMO and the LUMO energies (a.u.) and the HOMO-LUMO energy gap (eV) of compounds 2a, 2a(-), 2a\_1(-)\_Ag<sup>+</sup> and 2a\_2(-)\_Ag<sup>+</sup>**

| Molecule                | E <sub>HOMO</sub> (au) | E <sub>LUMO</sub> (au) | ΔE <sub>H-L</sub>  (eV) |
|-------------------------|------------------------|------------------------|-------------------------|
| 2a                      | -0.22739               | -0.04890               | 4.86                    |
| 2a(-)                   | -0.04901               | 0.11422                | 4.44                    |
| 2a_1(-)_Ag <sup>+</sup> | -0.21723               | -0.09518               | 3.32                    |



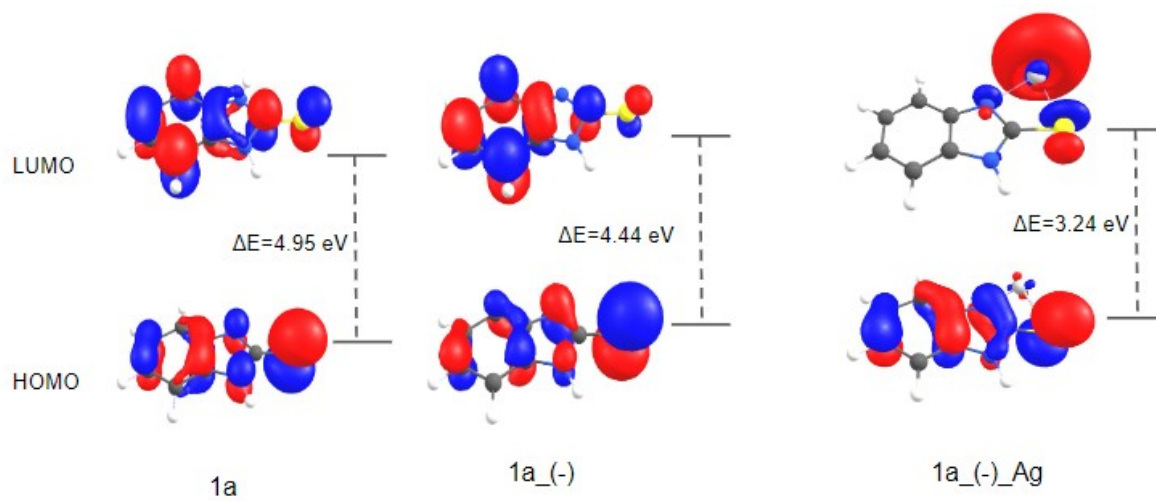

**Figure S9.** The HOMO, the LUMO and their energy gap of **1a** derivatives.

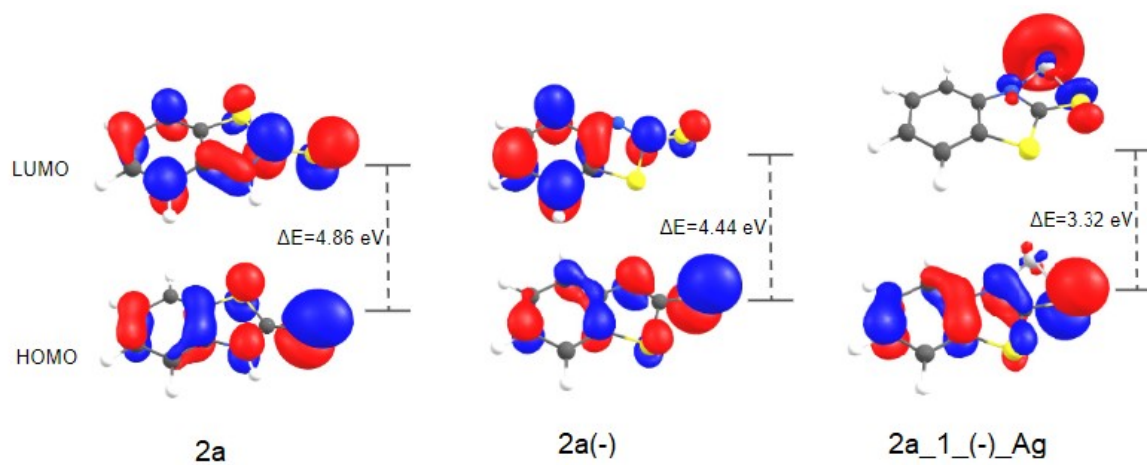

**Figure S10.** The HOMO, the LUMO and their energy gap of the **2a** derivatives.

**Table 17:** Selected bond lengths for interaction of 2-MBT with both Ag (I) and Ag (0). (Fig 9a main text)

| <b>Parameter</b> | <b>Values (Å)</b> |
|------------------|-------------------|
| S1-Ag10          | 3.31              |
| S8-Ag10          | 2.50              |
| S8-Ag9           | 2.54              |
| N3-Ag9           | 2.45              |

**Table 18:** Selected bond lengths for interaction of 2-MBI with both Ag (I) and Ag (0). (Fig 9b main text)

| <b>Parameter</b> | <b>Values (Å)</b> |
|------------------|-------------------|
| N1-Ag10          | 3.37              |
| S8-Ag10          | 2.51              |
| S8-Ag9           | 2.58              |
| N3-Ag9           | 2.33              |

## The co-ordinates of the optimized structures reported in this manuscript

The optimizations were done using the PBE0 density functional with the incorporation of Grimme's third-order dispersion correction with Becke-Johnson damping. The Def2-TZVP basis sets were used in the calculations.

### 1a

| Atom | X            | Y           | Z            |
|------|--------------|-------------|--------------|
| 6    | 1.419411000  | 0.000000000 | 1.807792000  |
| 6    | 0.695698000  | 0.000000000 | 2.994703000  |
| 6    | -0.695698000 | 0.000000000 | 2.994703000  |
| 6    | -1.419411000 | 0.000000000 | 1.807792000  |
| 6    | -0.700862000 | 0.000000000 | 0.627924000  |
| 6    | 0.700862000  | 0.000000000 | 0.627924000  |
| 7    | 1.081444000  | 0.000000000 | -0.697058000 |
| 6    | 0.000000000  | 0.000000000 | -1.532478000 |
| 7    | -1.081444000 | 0.000000000 | -0.697058000 |
| 1    | -2.017534000 | 0.000000000 | -1.061093000 |
| 16   | 0.000000000  | 0.000001000 | -3.179766000 |
| 1    | 2.017533000  | 0.000000000 | -1.061093000 |
| 1    | -2.502496000 | 0.000000000 | 1.809877000  |
| 1    | -1.227846000 | 0.000001000 | 3.937975000  |
| 1    | 1.227846000  | 0.000001000 | 3.937975000  |
| 1    | 2.502496000  | 0.000000000 | 1.809877000  |

**1a (-)**

| Atom | X            | Y            | Z            |
|------|--------------|--------------|--------------|
| 6    | 1.802516000  | 1.412037000  | 0.000000000  |
| 6    | 2.993098000  | 0.684554000  | 0.000000000  |
| 6    | 2.976647000  | -0.709323000 | 0.000000000  |
| 6    | 1.781283000  | -1.421682000 | 0.000000000  |
| 6    | 0.577449000  | -0.720664000 | 0.000000000  |
| 6    | 0.616746000  | 0.700103000  | 0.000000000  |
| 7    | -0.698434000 | 1.058778000  | 0.000000000  |
| 6    | -1.490457000 | -0.089125000 | 0.000000000  |
| 7    | -0.709851000 | -1.172218000 | -0.000001000 |
| 16   | -3.177688000 | 0.042718000  | 0.000001000  |
| 1    | -1.098852000 | 1.978196000  | 0.000000000  |
| 1    | 1.773083000  | -2.506353000 | 0.000000000  |
| 1    | 3.918383000  | -1.249606000 | 0.000001000  |
| 1    | 3.941395000  | 1.211776000  | 0.000000000  |
| 1    | 1.813140000  | 2.497682000  | 0.000000000  |

**1a (-) \_Ag<sup>+</sup>**

| Atom | X            | Y            | Z            |
|------|--------------|--------------|--------------|
| 6    | 1.466898000  | 0.170288000  | 4.354798000  |
| 6    | 0.610787000  | -0.005188000 | 5.432549000  |
| 6    | -0.759788000 | -0.194955000 | 5.245552000  |
| 6    | -1.322109000 | -0.216021000 | 3.978893000  |
| 6    | -0.480013000 | -0.042005000 | 2.888223000  |
| 6    | 0.900459000  | 0.148696000  | 3.092723000  |
| 7    | 1.430436000  | 0.287435000  | 1.827828000  |
| 6    | 0.418813000  | 0.184529000  | 0.922459000  |
| 7    | -0.744404000 | -0.014820000 | 1.536764000  |
| 16   | 0.599677000  | 0.294547000  | -0.782035000 |
| 1    | 2.392842000  | 0.436392000  | 1.584422000  |
| 1    | -2.386100000 | -0.362859000 | 3.836182000  |
| 1    | -1.396922000 | -0.328208000 | 6.111994000  |
| 1    | 1.014515000  | 0.005711000  | 6.437797000  |
| 1    | 2.530612000  | 0.317507000  | 4.500695000  |
| 47   | -1.837035000 | -0.082894000 | -0.555334000 |

**2a**

| Atom | X            | Y            | Z           |
|------|--------------|--------------|-------------|
| 6    | 1.893296000  | 1.487721000  | 0.000000000 |
| 6    | 3.117000000  | 0.837304000  | 0.000000000 |
| 6    | 3.190841000  | -0.552117000 | 0.000000000 |
| 6    | 2.038073000  | -1.323402000 | 0.000000000 |
| 6    | 0.811785000  | -0.680090000 | 0.000000000 |
| 6    | 0.741324000  | 0.716605000  | 0.000000000 |
| 7    | -0.562502000 | 1.158230000  | 0.000000000 |
| 6    | -1.544460000 | 0.220641000  | 0.000000000 |
| 16   | -0.791303000 | -1.357548000 | 0.000000000 |
| 16   | -3.156616000 | 0.503020000  | 0.000000000 |
| 1    | -0.825695000 | 2.131253000  | 0.000000000 |
| 1    | 2.094657000  | -2.405012000 | 0.000000000 |
| 1    | 4.157981000  | -1.039439000 | 0.000000000 |
| 1    | 4.028320000  | 1.422681000  | 0.000000000 |
| 1    | 1.835110000  | 2.569816000  | 0.000000000 |

**2a (-)**

| Atom | X            | Y            | Z            |
|------|--------------|--------------|--------------|
| 6    | 1.872594000  | 1.482119000  | 0.000000000  |
| 6    | 3.104371000  | 0.846842000  | 0.000000000  |
| 6    | 3.194128000  | -0.543638000 | 0.000000000  |
| 6    | 2.038131000  | -1.316933000 | 0.000000000  |
| 6    | 0.803182000  | -0.688229000 | 0.000000000  |
| 6    | 0.695212000  | 0.728042000  | 0.000000000  |
| 7    | -0.563410000 | 1.242698000  | 0.000000000  |
| 6    | -1.497799000 | 0.318078000  | 0.000000000  |
| 16   | -0.790858000 | -1.346251000 | 0.000000000  |
| 16   | -3.167595000 | 0.475752000  | -0.000001000 |
| 1    | 2.103343000  | -2.399983000 | 0.000000000  |
| 1    | 4.165419000  | -1.026853000 | 0.000000000  |
| 1    | 4.012454000  | 1.441726000  | 0.000000000  |
| 1    | 1.796272000  | 2.563692000  | 0.000000000  |

**2a\_1(-) \_Ag<sup>+</sup>**

| Atom | X            | Y            | Z            |
|------|--------------|--------------|--------------|
| 6    | 2.642991000  | -0.031016000 | -0.024848000 |
| 6    | 3.835459000  | -0.730260000 | -0.031091000 |
| 6    | 3.851667000  | -2.125247000 | -0.037226000 |
| 6    | 2.669810000  | -2.847046000 | -0.037218000 |
| 6    | 1.472403000  | -2.147318000 | -0.030982000 |
| 6    | 1.444549000  | -0.739938000 | -0.024694000 |
| 7    | 0.183429000  | -0.196199000 | -0.019227000 |
| 6    | -0.758741000 | -1.112571000 | -0.020714000 |
| 16   | -0.153947000 | -2.746754000 | -0.029411000 |
| 16   | -2.433703000 | -0.753531000 | -0.014286000 |
| 1    | 2.682049000  | -3.930287000 | -0.042025000 |
| 1    | 4.798390000  | -2.651817000 | -0.042114000 |
| 1    | 4.772831000  | -0.186523000 | -0.031290000 |
| 1    | 2.624419000  | 1.052353000  | -0.020144000 |
| 47   | -1.522560000 | 1.524363000  | -0.001277000 |



**2a\_2(-)\_Ag<sup>+</sup>**

| Atom | X            | Y            | Z            |
|------|--------------|--------------|--------------|
| 6    | 4.291339000  | 1.123758000  | -0.154640000 |
| 6    | 5.434246000  | 0.366136000  | 0.018875000  |
| 6    | 5.361555000  | -1.015758000 | 0.197385000  |
| 6    | 4.139142000  | -1.666164000 | 0.205309000  |
| 6    | 2.992764000  | -0.906601000 | 0.029380000  |
| 6    | 3.050101000  | 0.491658000  | -0.151589000 |
| 7    | 1.838358000  | 1.123880000  | -0.305942000 |
| 6    | 0.862040000  | 0.284764000  | -0.266775000 |
| 16   | 1.334675000  | -1.395440000 | -0.035522000 |
| 16   | -0.801771000 | 0.725634000  | -0.479338000 |
| 1    | 4.083491000  | -2.739413000 | 0.341148000  |
| 1    | 6.271104000  | -1.589606000 | 0.329039000  |
| 1    | 6.402771000  | 0.852160000  | 0.014819000  |
| 1    | 4.336096000  | 2.196834000  | -0.294638000 |
| 47   | -1.815198000 | -1.132108000 | 0.516729000  |

**2a\_1(-)\_Ag<sup>+</sup>\_Ag(0) (Fig. 9a main text)**

| Atom | X            | Y            | Z            |
|------|--------------|--------------|--------------|
| 6    | 3.179062000  | 2.499220000  | 0.587630000  |
| 6    | 4.456522000  | 2.077875000  | 0.903957000  |
| 6    | 4.716046000  | 0.745934000  | 1.230671000  |
| 6    | 3.698393000  | -0.192199000 | 1.247264000  |
| 6    | 2.416292000  | 0.229685000  | 0.928855000  |
| 6    | 2.143560000  | 1.568819000  | 0.597718000  |
| 7    | 0.823746000  | 1.827404000  | 0.307850000  |
| 6    | 0.081367000  | 0.756958000  | 0.401701000  |
| 16   | 0.940096000  | -0.681995000 | 0.858645000  |
| 16   | -1.615026000 | 0.793516000  | 0.081346000  |
| 1    | 3.899866000  | -1.225735000 | 1.501807000  |
| 1    | 5.726309000  | 0.440311000  | 1.474705000  |
| 1    | 5.270706000  | 2.792773000  | 0.898429000  |
| 1    | 2.969977000  | 3.531284000  | 0.333570000  |
| 47   | -1.068669000 | 3.237700000  | -0.361473000 |
| 47   | -2.250650000 | -1.546368000 | 0.687371000  |

**1a\_1(-)\_Ag<sup>+</sup>\_Ag(0) (Fig. 9b main text)**

| Atom | X            | Y            | Z            |
|------|--------------|--------------|--------------|
| 6    | 0.841415000  | -1.504555000 | 3.250687000  |
| 6    | 0.105513000  | -1.597473000 | 4.421815000  |
| 6    | -1.263292000 | -1.317181000 | 4.445170000  |
| 6    | -1.944111000 | -0.935854000 | 3.301140000  |
| 6    | -1.221808000 | -0.837367000 | 2.119017000  |
| 6    | 0.156045000  | -1.122071000 | 2.110532000  |
| 7    | 0.552581000  | -0.925797000 | 0.804134000  |
| 6    | -0.533319000 | -0.548032000 | 0.084226000  |
| 7    | -1.616258000 | -0.486890000 | 0.844904000  |
| 16   | -0.575300000 | -0.160444000 | -1.598621000 |
| 1    | 1.472861000  | -1.045455000 | 0.410909000  |
| 1    | -3.005274000 | -0.718567000 | 3.320052000  |
| 1    | -1.802283000 | -1.400504000 | 5.381466000  |
| 1    | 0.602953000  | -1.892652000 | 5.337777000  |
| 1    | 1.902883000  | -1.720862000 | 3.233956000  |
| 47   | -3.030843000 | 0.179420000  | -0.884774000 |
| 47   | 1.673804000  | -0.969617000 | -2.377501000 |
